# Supplementary material for: Higher-order phosphatase–substrate contacts terminate the integrated stress response
Source: PubMed Central journal article supplement (PMC8500838; doi:10.1038/s41594-021-00666-7), 2021-10-08
Supplement: 41594_2021_666_MOESM6_ESM.pdf [file 41594_2021_666_MOESM6_ESM.pdf]

# Original gels for Fig. 2a

## Phos-tag gel 1 (R15/PP1A 8nM)

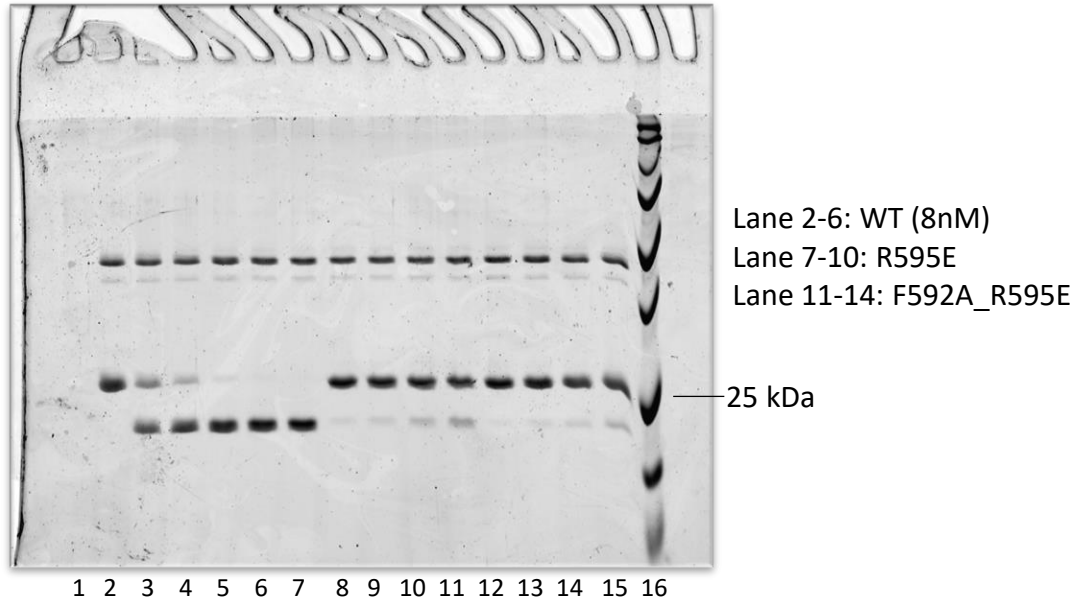

## Phos-tag gel 2 (R15/PP1A 8nM)

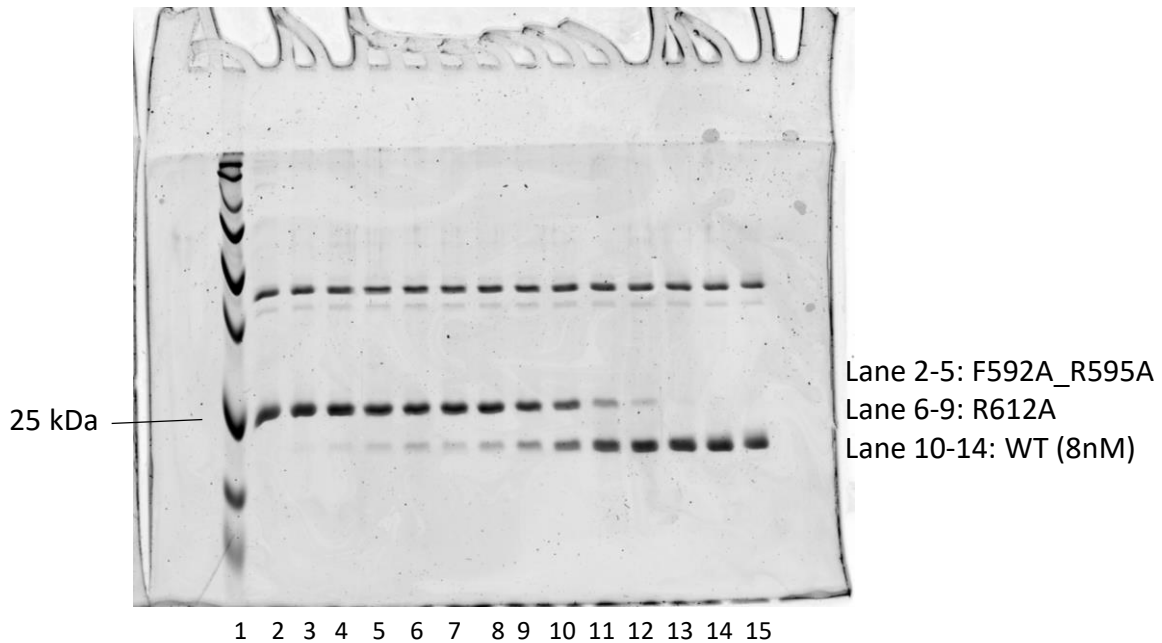

### Phos-tag gel 3

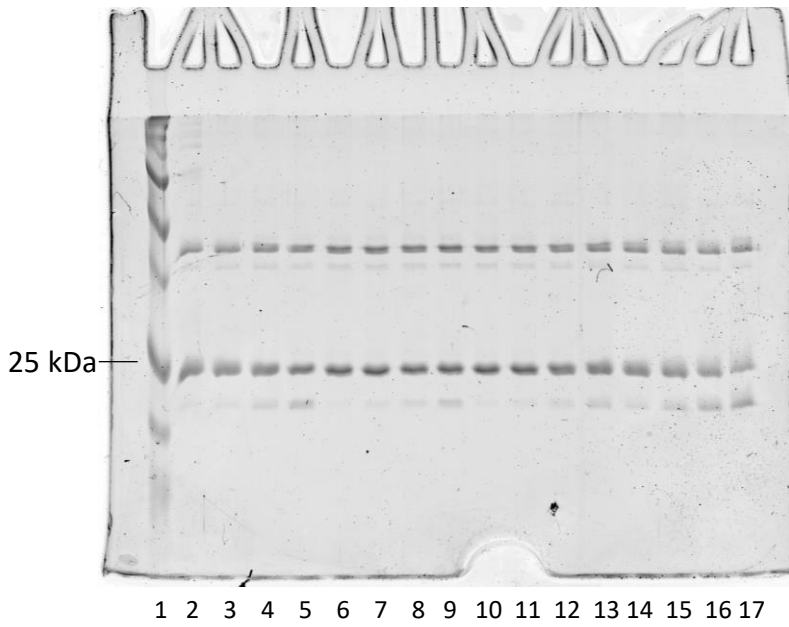

Lane 2-5: R595E  
Lane 6-9: F592A\_R595E  
Lane 10-13: F592A\_R595A  
Lane 14-17: R612

### Phos-tag gel 4

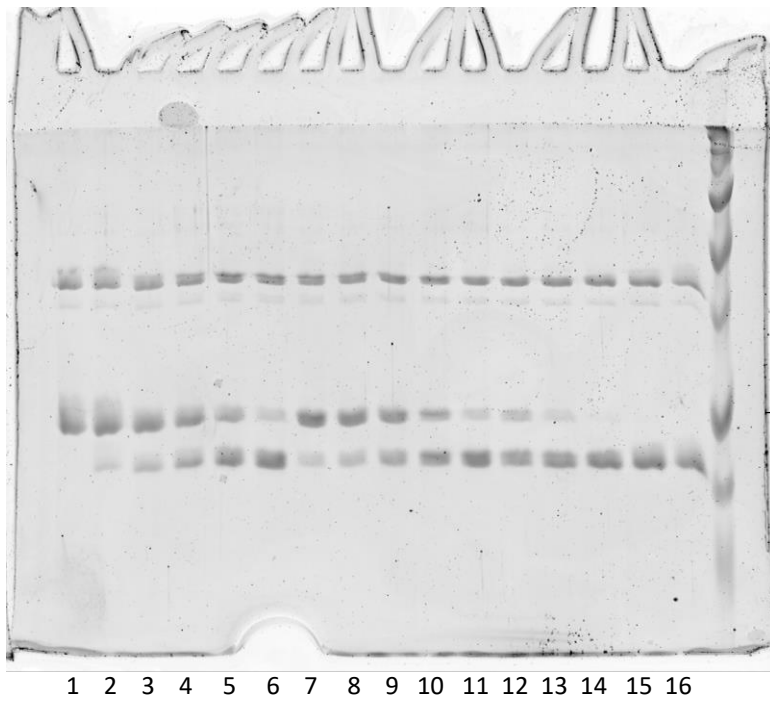

Lane 2-6: WT (2nM)  
Lane 7-11: WT (2nM)  
Lane 11-16: WT (8nM)

### Phos-tag gel 5

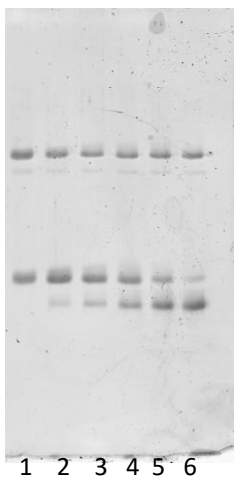

Lane 1-6: WT (2nM)
