# Supplementary material for: Higher-order phosphatase–substrate contacts terminate the integrated stress response
Source: PubMed Central journal article supplement (PMC8500838; doi:10.1038/s41594-021-00666-7), 2021-10-08
Supplement: 41594_2021_666_MOESM9_ESM.pdf [file 41594_2021_666_MOESM9_ESM.pdf]

# Original Phos-tag SDS PAGE for Fig. 5a

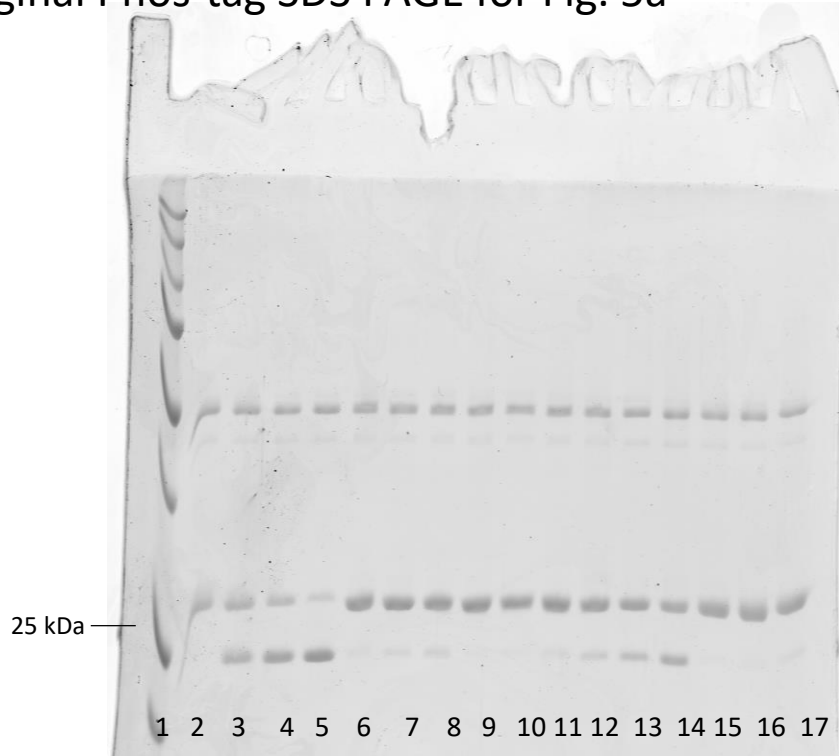

Full gel for Figure 6a top:

lane 3-5: WT  
lane 6-8: W582A  
lane 9-11: R591A  
lane 12-14: R594A  
lane 15-17: R591/594A

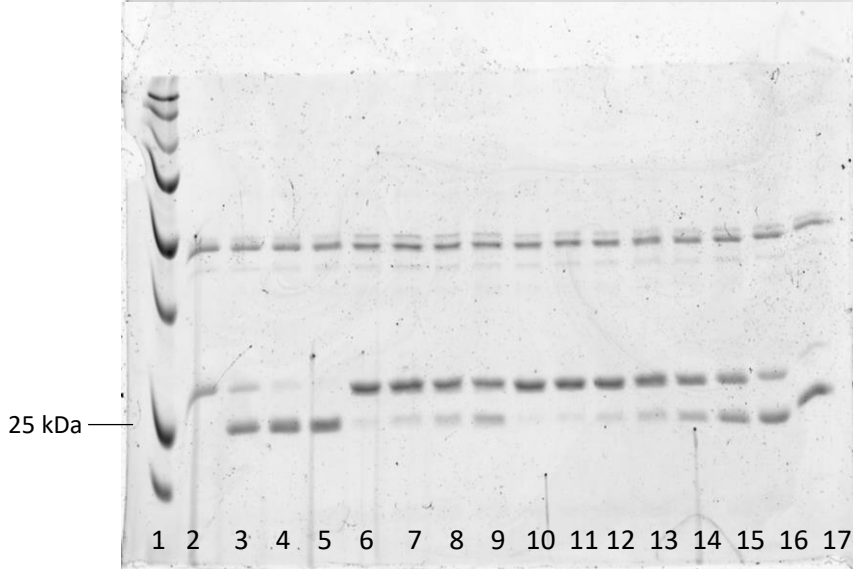

Full gel for Figure 6a bottom:

lane 3-5: WT  
lane 6-9: W582A  
lane 10-13: R591A  
lane 14-17: R594A

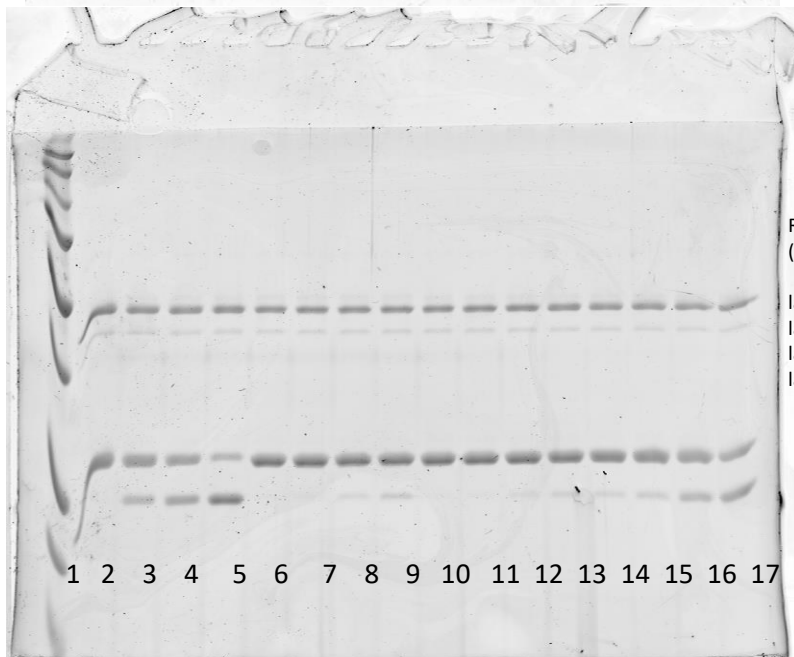

Repeat of Fig. 5a  
(R15/PP1A: 2.7nM)

lane 3-5: WT (5min, 10min, 30min)  
lane 6-9: W582A (5min, 10min, 30min, 60min)  
lane 10-13: R591A (5min, 10min, 30min, 60min)  
lane 14-17: R594A (5min, 10min, 30min, 60min)

# Original Phos-tag SDS PAGE for Fig. 5b

## 50min

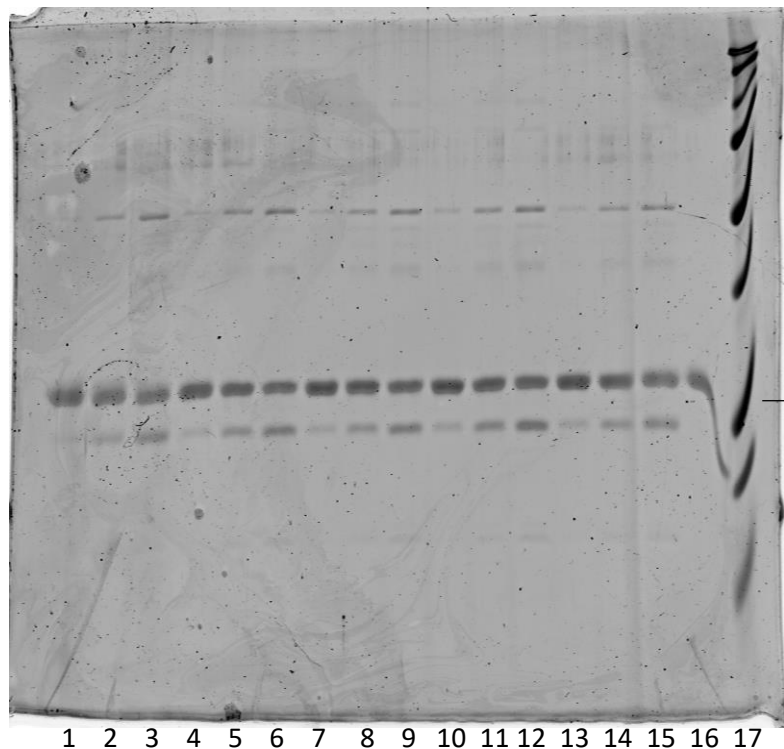

| lane | R15/PP1 (nM) | R15A mutation   |
|------|--------------|-----------------|
| 1    | 8            | WT              |
| 2    | 32           |                 |
| 3    | 64           |                 |
| 4    | 8            | W582A           |
| 5    | 32           |                 |
| 6    | 64           |                 |
| 7    | 8            | R591A           |
| 8    | 32           |                 |
| 9    | 64           |                 |
| 10   | 8            | R594A           |
| 11   | 32           |                 |
| 12   | 64           |                 |
| 13   | 8            | R591A;<br>R594A |
| 14   | 32           |                 |
| 15   | 64           |                 |
| 16   | NA           | eIF2a-NTD-P     |
| 17   | NA           | MWM             |

## 25min

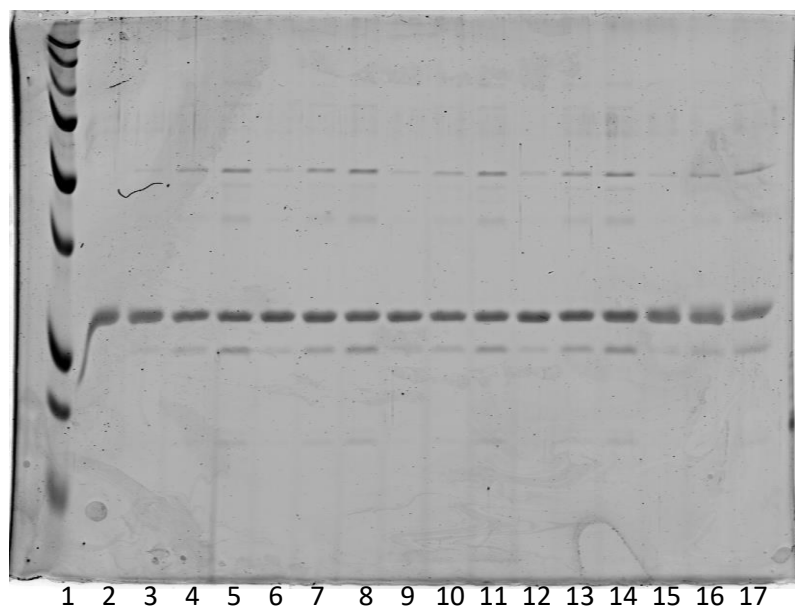

| lane | R15/PP1 (nM) | R15A mutation |
|------|--------------|---------------|
| 1    | NA           | MWM           |
| 2    | NA           | 2a-P          |
| 3    | 8            | WT            |
| 4    | 32           |               |
| 5    | 64           |               |
| 6    | 8            | W582A         |
| 7    | 32           |               |
| 8    | 64           |               |
| 9    | 8            | R591A         |
| 10   | 32           |               |
| 11   | 64           |               |
| 12   | 8            | R594A         |
| 13   | 32           |               |
| 14   | 64           |               |
| 15   | 8            | R591A; R594A  |
| 16   | 32           |               |
| 17   | 64           |               |
