# Supplementary material for: Higher-order phosphatase–substrate contacts terminate the integrated stress response
Source: PubMed Central journal article supplement (PMC8500838; doi:10.1038/s41594-021-00666-7), 2021-10-08
Supplement: 41594_2021_666_MOESM11_ESM.pdf [file 41594_2021_666_MOESM11_ESM.pdf]

Original Phos-tag SDS PAGE for Fig. 6b

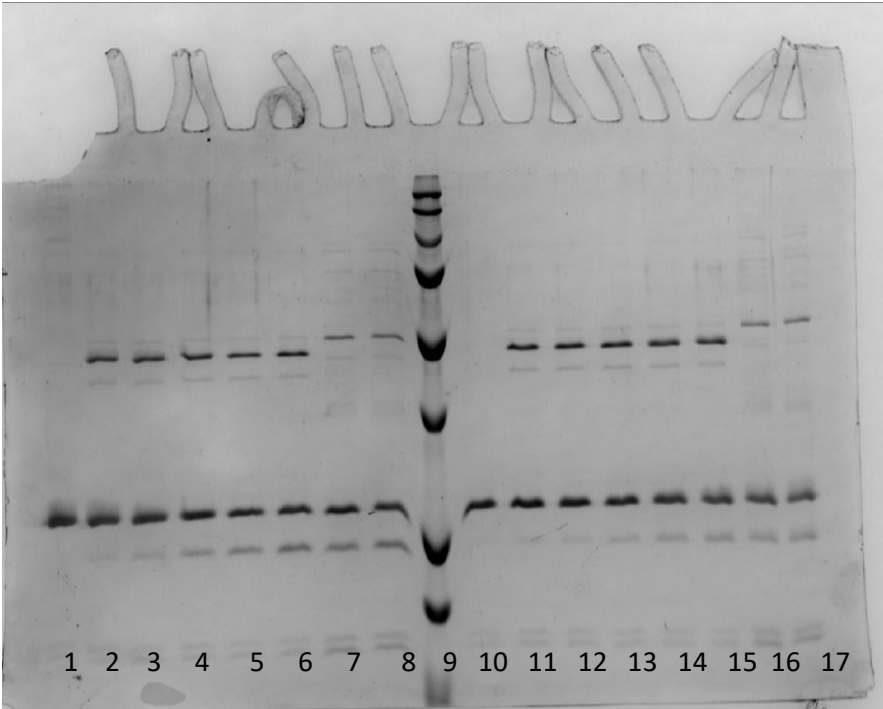

Full gel for Fig 6b top (Exp 6)  
Lane 1-6: K79A(with actin)  
lane 7-8: K79A (no actin)  
lane 10-15: Y81A (with actin)  
lane 16-17: Y81A (no actin)

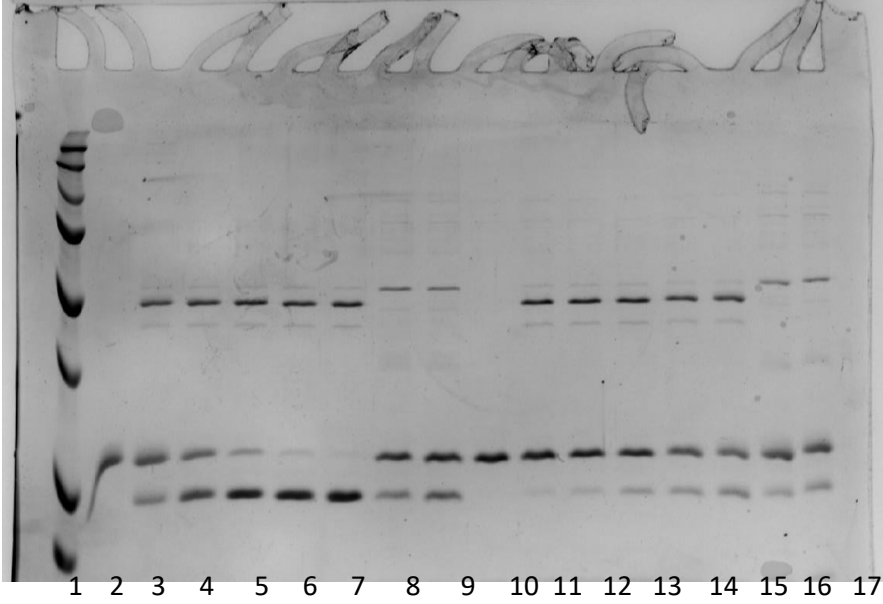

Full gel for Fig 6b top (Exp 6)  
Lane 2-7: WT (with actin)  
lane 8-9: WT (no actin)  
lane 10-15 M44A (with actin)  
lane 16-17: M44A (no actin)

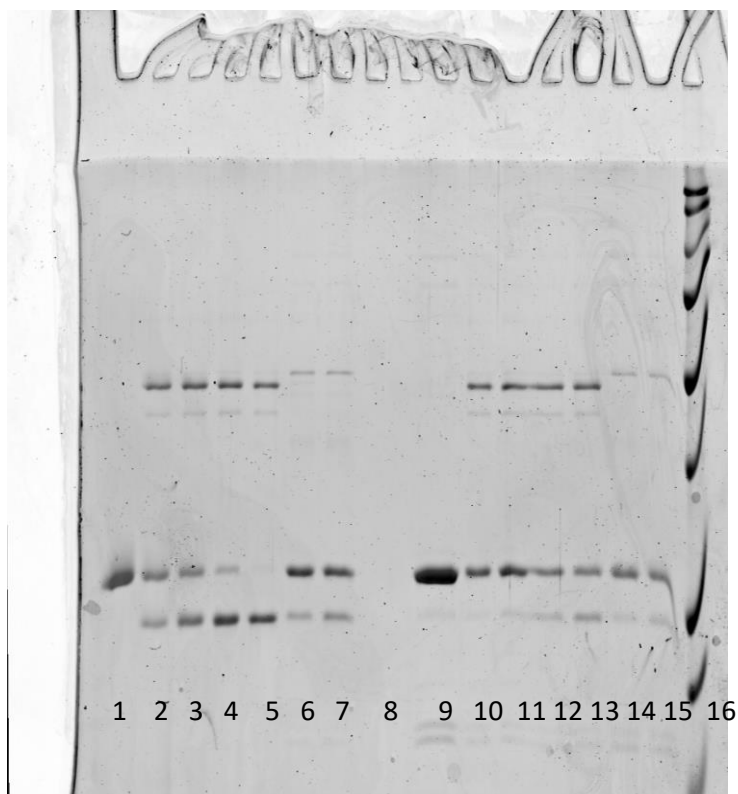

Repeated gel for Fig 6b top (Exp 5)  
 Lane 1-5: WT (with actin)  
 lane 6-7: WT (no actin)  
 lane 9-13 M44A (with actin)  
 lane 14-15: M44A (no actin)

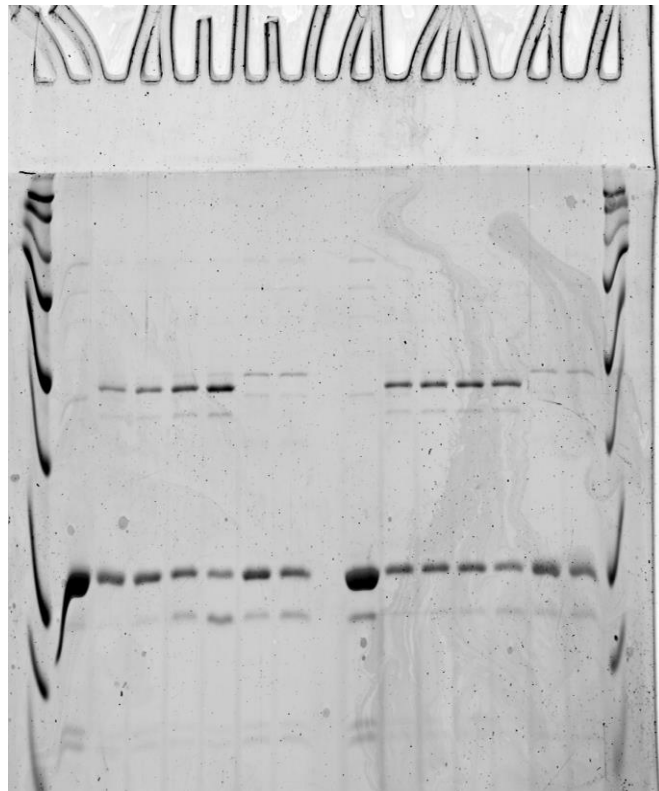

Repeated gel for Fig 6b top (Exp 5):  
 Lane 2-6: K79A (with actin)  
 lane 7-8: K79A (no actin)  
 lane 9-13: Y81A (with actin)  
 lane 14-15: Y81A (no actin)

Original Phos-tag SDS PAGE for Fig. 6c

EXP 3

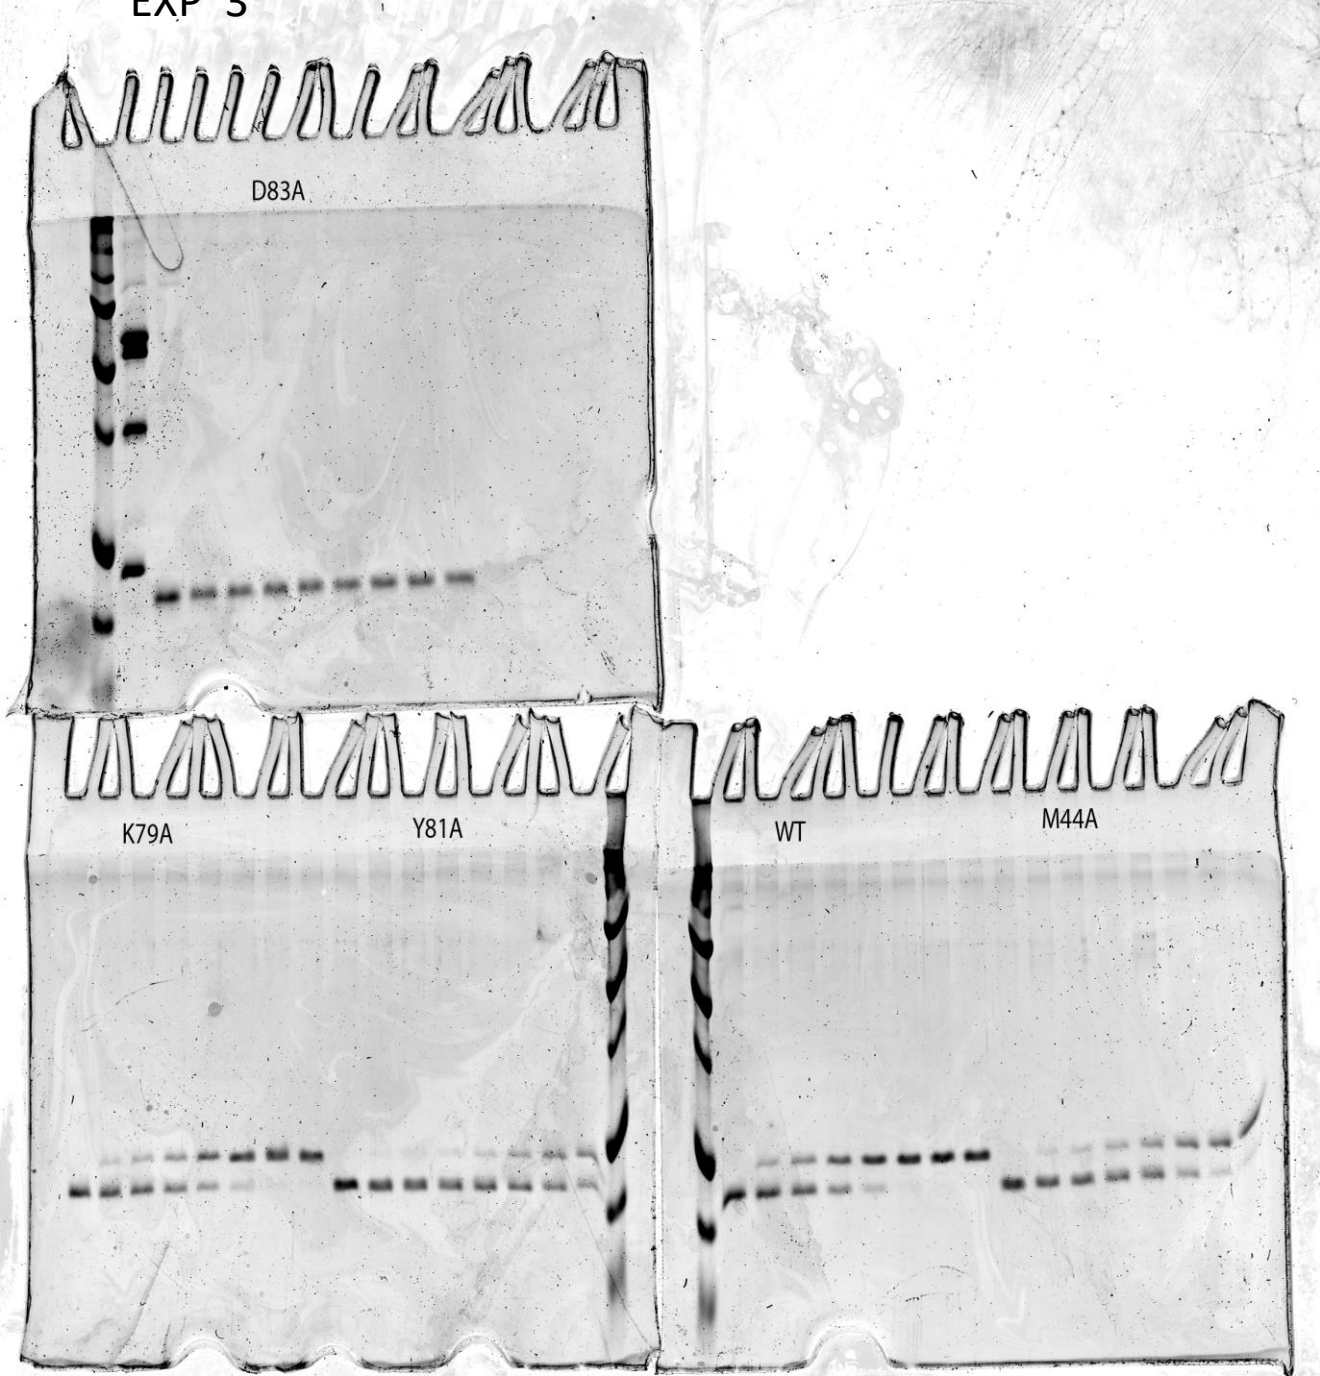

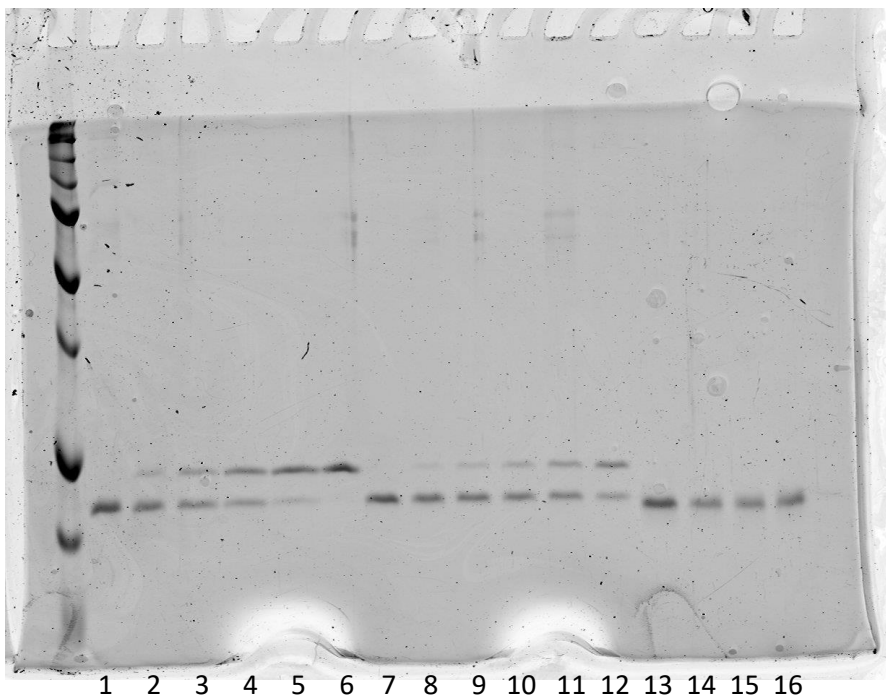

Lane 1-6: WT (Time: 0, 3.5, 6.5, 12.5, 24.5, 48.5min)  
 Lane 7-12: M44A (Time: 0, 3.5, 6.5, 12.5, 24.5, 48.5min)  
 Lane 13-16: D83A (Time: 0, 3.5, 6.5, 12.5min)

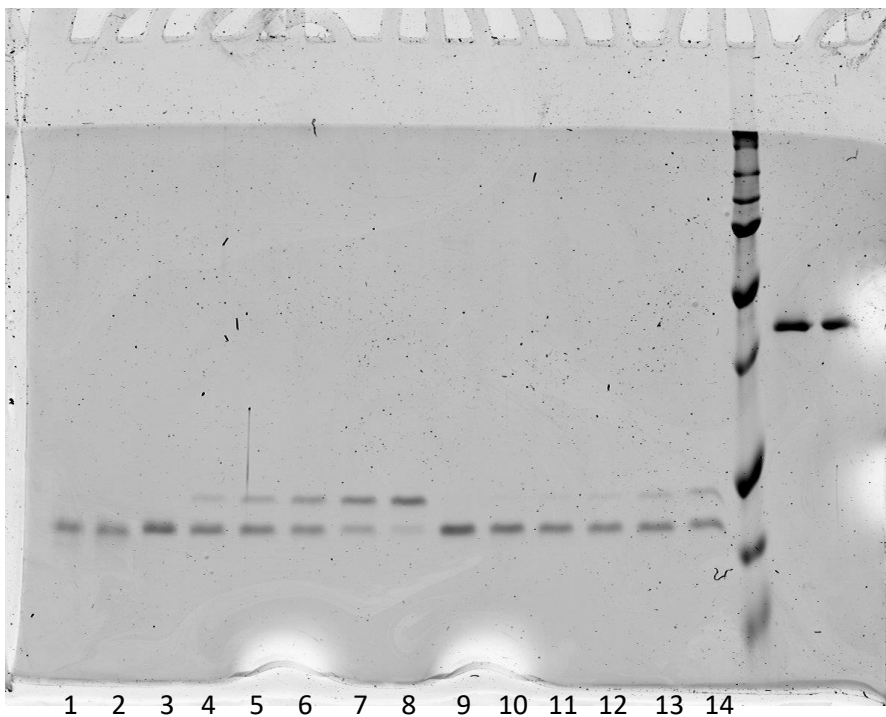

Lane 1-2: D83A (Time: 24.5, 48.5min)  
 Lane 3-8: K79A (Time: 0, 3.5, 6.5, 12.5, 24.5, 48.5min)  
 Lane 9-14: Y81A (Time: 0, 3.5, 6.5, 12.5, 24.5, 48.5min)
